# Supplementary material for: Multiple stimuli-responsive flexible crystal with 2D elastic bending, plastic twisting and photoinduced bending capabilities
Source: Royal Society of Chemistry journal article supplement (doi:10.1039/d1tc04027h), 2021-01-01
Supplement: d1tc04027h5.pdf [file d1tc04027h5.pdf]

## Supplementary Information

### Multiple Stimuli-Responsive Flexible Crystal with 2D Elastic Bending, Plastic Twisting and Photoinduced Bending Capabilities

Kui Chen<sup>a</sup>, Jingkang Wang<sup>a,b</sup>, Yaoguang Feng<sup>a</sup>, Han Liu<sup>a</sup>, Xiunan Zhang<sup>a</sup>, Yunhui Hao<sup>a</sup>,  
Ting Wang<sup>a,b</sup>, Xin huang<sup>a,b\*</sup>, Hongxun Hao<sup>a,b\*</sup>

<sup>a</sup> National Engineering Research Center of Industrial Crystallization Technology,  
School of Chemical Engineering and Technology, Tianjin University, Tianjin 300072,  
China.

<sup>b</sup> Collaborative Innovation Center of Chemical Science and Engineering (Tianjin),  
Tianjin, 300072, China

### Contents

|                                                                          |   |
|--------------------------------------------------------------------------|---|
| Experiments.....                                                         | 2 |
| Crystal information .....                                                | 3 |
| Face index .....                                                         | 3 |
| Elastic strain calculation .....                                         | 4 |
| SEM images of twisted 9-AA crystals .....                                | 4 |
| PXRD and DSC of original and twisted 9-AA crystals .....                 | 4 |
| Stress distributions of bending process and twisting process .....       | 5 |
| Indenter impressions and 3D scans of 9-AA crystals .....                 | 6 |
| Schematic illustration of molecular layers and indenter directions. .... | 6 |
| Three-dimensional topologies of energy framework .....                   | 7 |
| Molecular structure pairs and the interaction energies .....             | 7 |
| Illustration of segregated interaction energies .....                    | 8 |
| Fluorescence lifetime and quantum yield .....                            | 8 |

## Experiments

### 1. one-step synthesis of 9-Anthraldehyde:

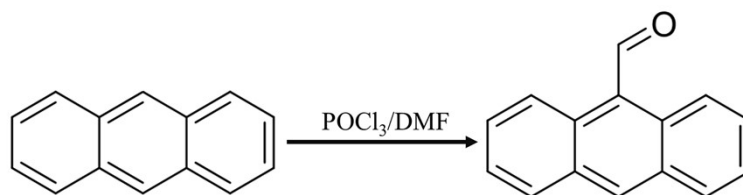

**Scheme S1.** Synthesis of 9- Anthraldehyde.

Anthracene (5.0 g, 28.1 mmol) was added into the phosphorus oxychloride (4 mL, 45 mmol), and the mixture was heated at 90 °C for 1 h under stirring. DMF (4 mL, 50 mmol) was dropwise added into the mixture over 0.5 h. The mixture was heated at 95 °C for 15 h with stirring, and then was cooled to 60 °C. Subsequently, 40 mL of deionized water (60 °C) was added by a peristaltic pump, and the mixed solution was heated to 65 °C for 0.5 h. The PH of the mixed solution was adjusted to 5 by dropwise adding saturated sodium acetate saturated aqueous solution under the fast stirring. After 0.5h, the mixed solution was cooled to room temperature without stirring, and it was extracted with DCM. Finally, the organic phase was evaporated with reduced pressure, then yellow solid (4.5g, 78% yield) was obtained.

### 2. Crystal growth:

1 mL CH<sub>2</sub>Cl<sub>2</sub> solution (0.2 M) was added into a test tube, and 4 mL hexane was added carefully along the tube wall to the top of the CH<sub>2</sub>Cl<sub>2</sub> solution, forming distinct solvent layer. Then, the test tube was blocked with a stopper at 5°C for 5-7 days to obtain acicular single crystals.

## Crystal information

**Table. S1** Crystallographic information table of 9-Anthraldehyde crystal.

|                         |                 |
|-------------------------|-----------------|
| Formula                 | $C_{15}H_{10}O$ |
| Formula weight          | 206.23          |
| Crystal system          | Orthorhombic    |
| Space group             | $P2_12_12_1$    |
| a / Å                   | 4.0806          |
| b / Å                   | 14.045          |
| c / Å                   | 17.078          |
| $\alpha / ^\circ$       | 90              |
| $\beta / ^\circ$        | 90              |
| $\gamma / ^\circ$       | 90              |
| Z, Z'                   | 4,1             |
| Volume / Å <sup>3</sup> | 978.77          |
| R-factor (%)            | 5.11            |
| CCDC Number             | 1510568         |

## Face index

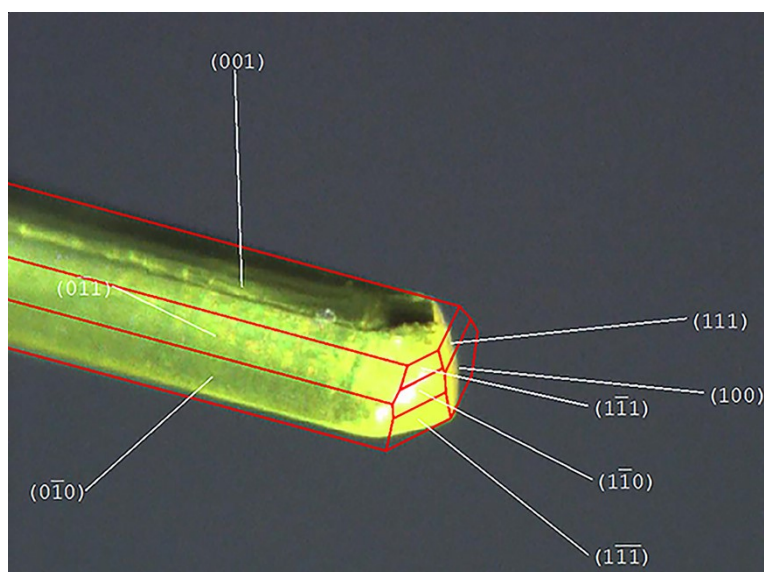

**Fig.S1** Face index of 9- Anthraldehyde crystal.

## Elastic strain calculation

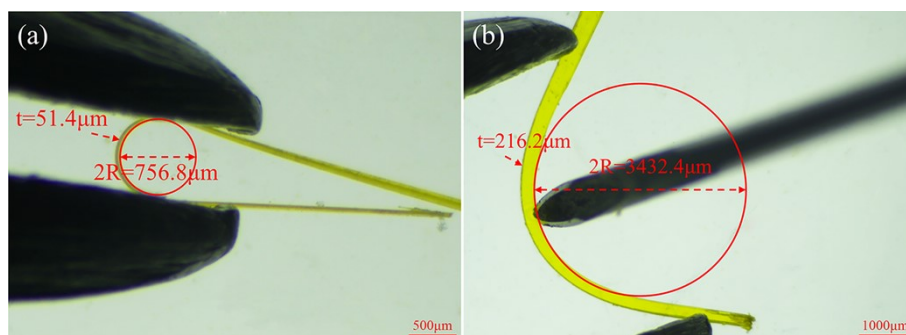

**Fig.S2** Elastic strain calculation of 9AA crystal (a) bending along [001] direction; (b) bending along [010] direction.

$$\varepsilon_1 = \frac{t}{2R} = \frac{51.4}{756.8} \times 100\% = 6.8\%$$

$$\varepsilon_2 = \frac{t}{2R} = \frac{216.2}{3432.4} \times 100\% = 6.3\%$$

## SEM images of twisted 9-AA crystals

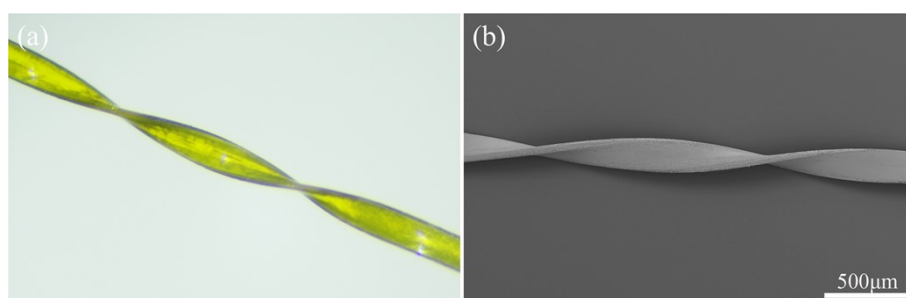

**Fig.S3** Optical images (a) and Scanning Electron Microscopy (SEM) images (b) of twisted 9-AA crystals.

## PXRD and DSC of original and twisted 9-AA crystals

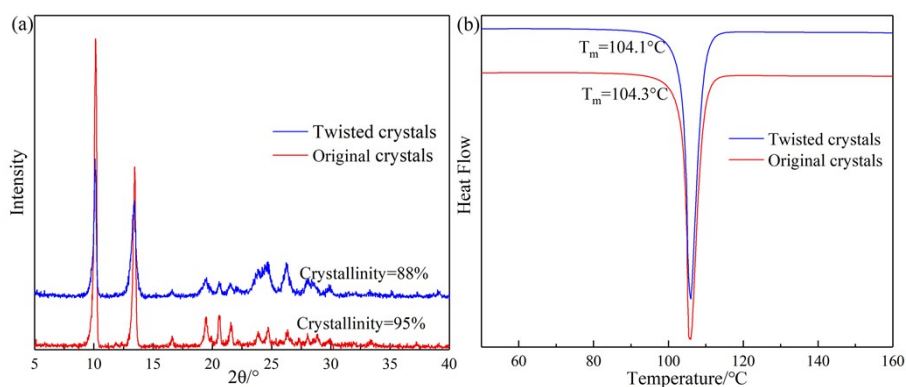

**Fig.S4** PXRD and DSC curves of original and twisted 9-AA crystals

## Stress distributions of bending process and twisting process

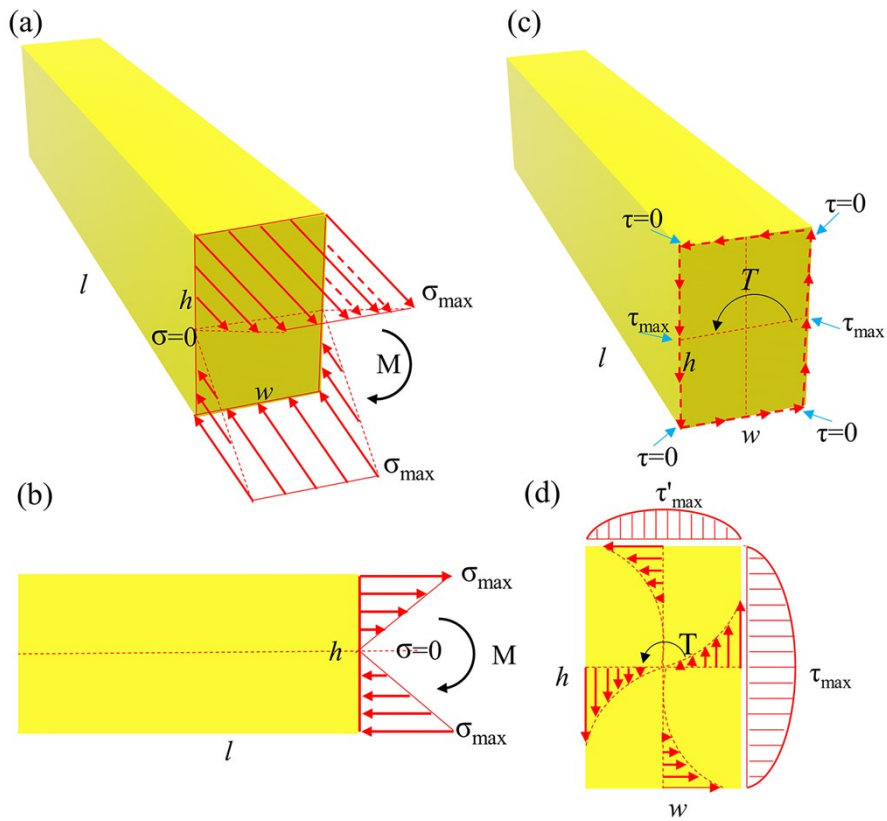

**Scheme S2.** Stress distributions of bending process (a), (b) and twisting process (c), (d).

## Indenter impressions and 3D scans of 9-AA crystals

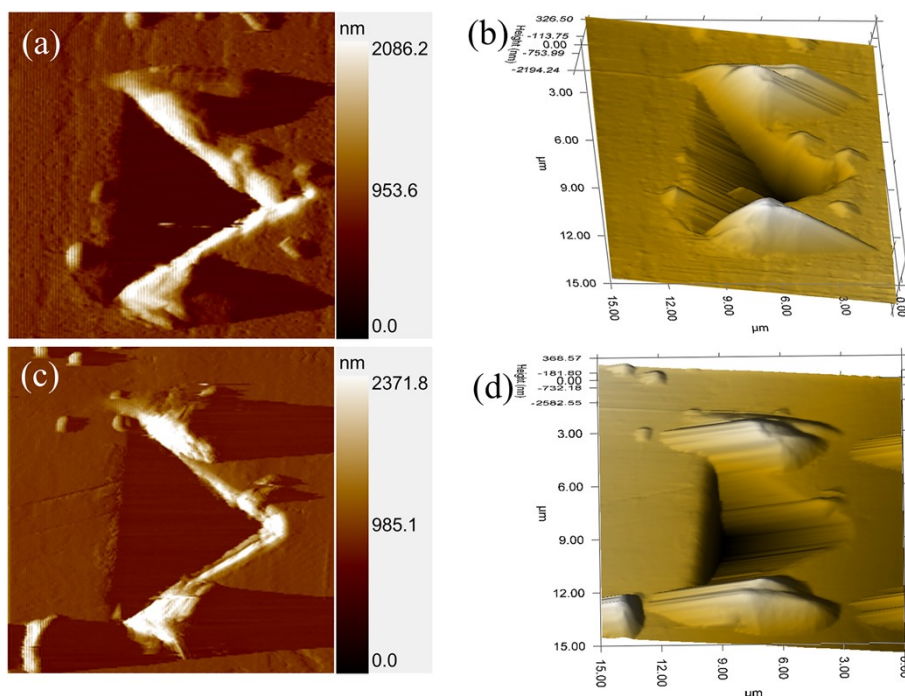

**Fig. S5** Indenter impressions of 9-AA crystals on (001) plane (a) and (010) plane (c); 3D scans of indented areas of 9-AA crystals on (001) plane (b) and (010) plane (d).

## Schematic illustration of molecular layers and indenter directions.

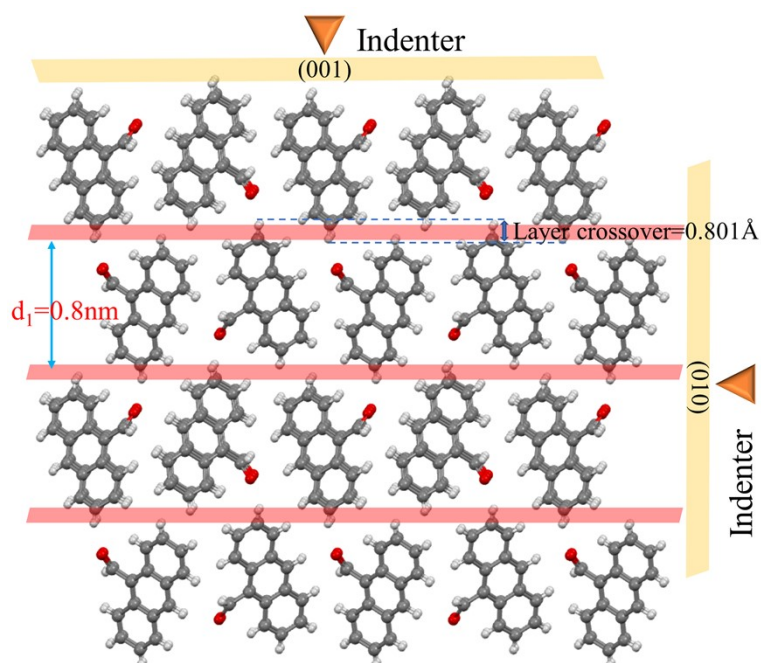

**Fig.S6** Schematic illustration of molecular layers and indenter directions.

## Three-dimensional topologies of energy framework

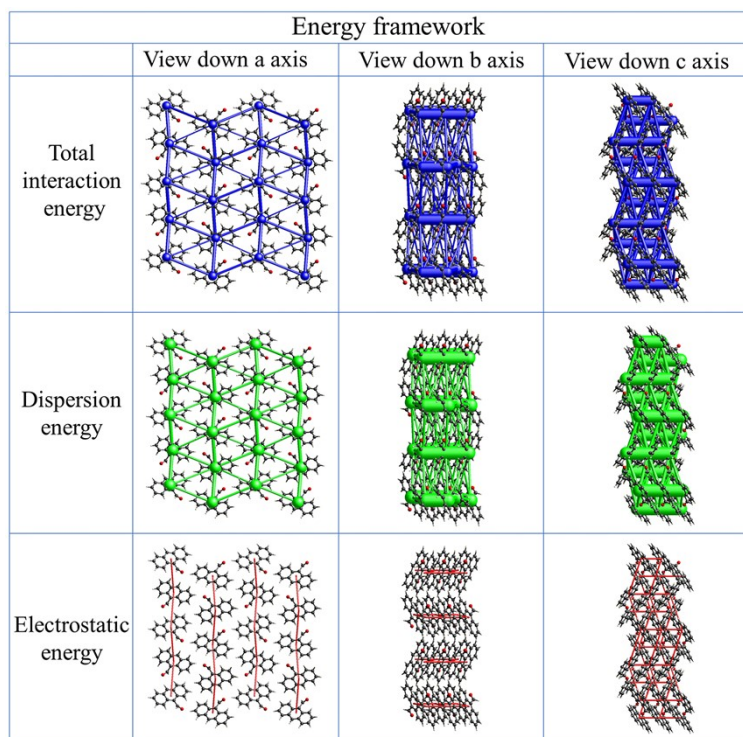

**Fig.S7** Three-dimensional topologies of energy framework for 9AA

## Molecular structure pairs and the interaction energies

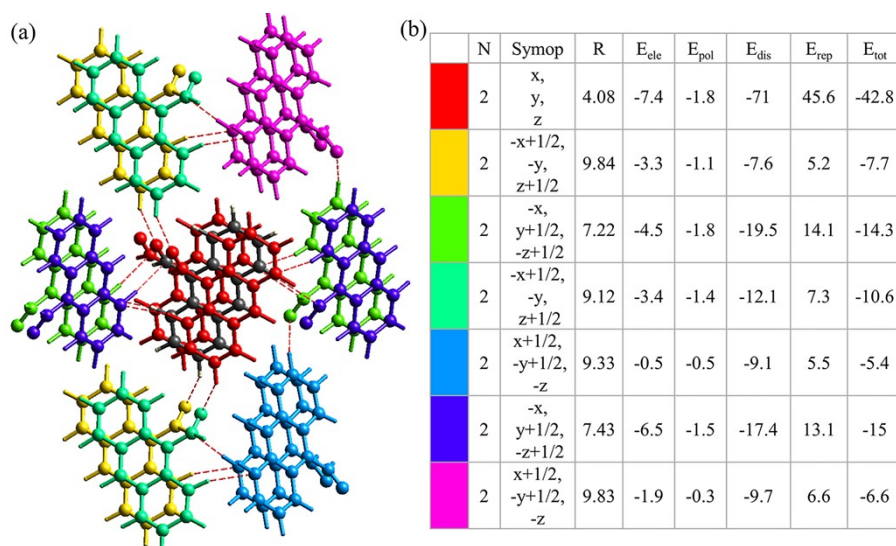

**Fig.S8** Molecular structure pairs and the interaction energies obtained from energy frameworks. Scale factors are in the bottom right table.

## Illustration of segregated interaction energies

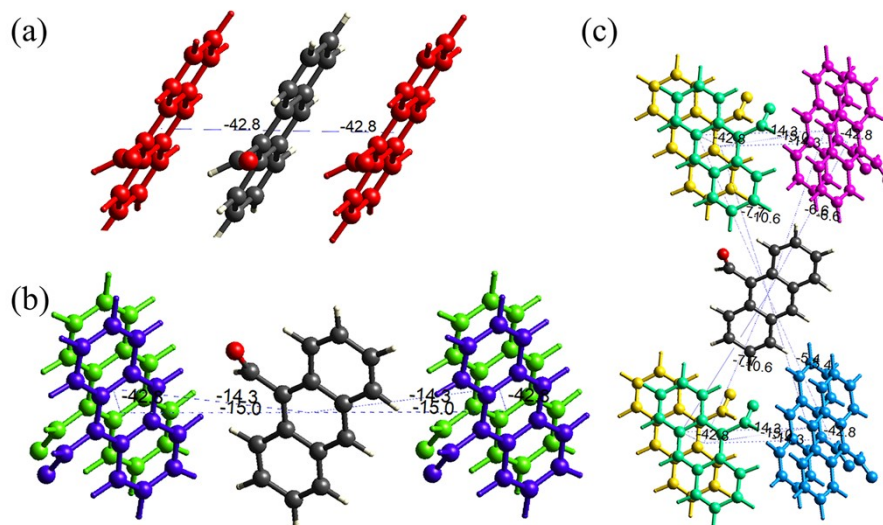

**Fig.S9** Illustration of calculated total interaction energies of  $\pi$ -stacking columns (a), inter-columns (b), and slip planes (c).

## Fluorescence lifetime and quantum yield

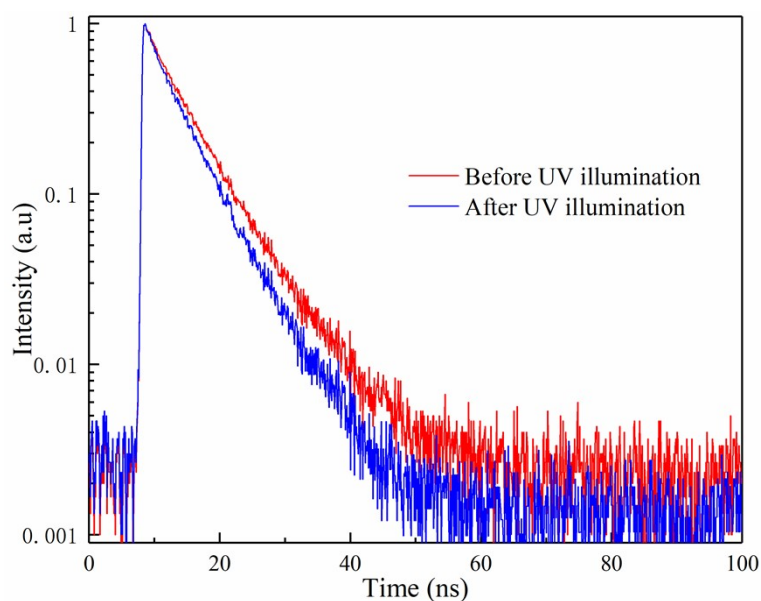

**Fig. S10** Fluorescence lifetime of 9-AA crystals before and after illumination

**Table. S2** Fluorescence lifetime and quantum yield measurement data

| Sample                 | $\tau_1$ (ns) | $\tau_2$ (ns) | $\tau$ (ns) | $\Phi_F$ (%) |
|------------------------|---------------|---------------|-------------|--------------|
| Before UV illumination | 1.5893        | 6.3606        | 6.1702      | 1.76         |



---

|                       |        |        |        |      |
|-----------------------|--------|--------|--------|------|
| After UV illumination | 0.8287 | 5.5587 | 5.4845 | 1.53 |
|-----------------------|--------|--------|--------|------|

---
